# Supplementary material
Source: MDPI journal article supplement (https://www.mdpi.com/2411-5142/3/2/33)
Supplement: s1 [file s1]

**Supplementary material:** Morphotypological evaluation of the muscular chain.

| <b>Body variables</b>                    | <b>Closing</b>                                                                  | <b>Opening</b>                                                  |
|------------------------------------------|---------------------------------------------------------------------------------|-----------------------------------------------------------------|
| <b>Head</b><br>(total = 1 point)         | Forward head<br>Rectified cervical                                              | Backward head<br>Hyperlordosis cervical                         |
| <b>Shoulders</b><br>(total = 1.5 points) | R / L anteriorly<br>R / L depression<br>R / L abduction scapula                 | R / L posteriorly<br>R / L elevation<br>R / L adduction scapula |
| <b>Dorsal</b><br>(total = 1 point)       | Dorsal spine flexed in more than 2/3    Dorsal spine rectified in less than 2/3 |                                                                 |
| <b>Low back</b> (total = 1 point)        | Crossing point of the muscular chain. Mark 1 point for each morphology          |                                                                 |
| <b>Pelvis</b><br>(total = 1 point)       | Retroverted                                                                     | Anteverted                                                      |
| <b>Knees</b><br>(total = 1.5 points)     | R / L valgus<br>R / L internal rotation<br>R / L flexed                         | R / L varus<br>R / L external rotation<br>R / L extended        |
| <b>Foot</b><br>(total = 1 point)         | R / L valgus hindfoot<br>R / L valgus forefoot                                  | R / L varus hindfoot<br>R / L varus forefoot                    |
| <b>Morphopathological diagnosis</b>      |                                                                                 |                                                                 |

**Legend:** L = Left; R = Right.
